# Supplementary material for: Methylthiodeoxynivalenol (MTD): insight into the chemistry, structure and toxicity of thia-Michael adducts of trichothecenes
Source: Royal Society of Chemistry journal article supplement (doi:10.1039/c4ob00458b), 2014-01-01
Supplement: c4ob00458b1.pdf [file c4ob00458b1.pdf]

## Supplementary Information

### **Methylthiodeoxynivalenol (MTD): Insight into chemistry, structure and toxicity of thia-Michael adducts of trichothecenes**

Philipp Fruhmann,<sup>a#</sup> Theresa Weigl-Pollack,<sup>a#</sup> Hannes Mikula,<sup>\*a</sup>

Gerlinde Wiesenberger,<sup>b</sup> Gerhard Adam,<sup>b</sup> Elisabeth Varga,<sup>c</sup> Franz Berthiller,<sup>c</sup> Rudolf Krska,<sup>c</sup>

Christian Hametner,<sup>a</sup> Johannes Fröhlich<sup>a</sup>

<sup>a</sup> *Institute of Applied Synthetic Chemistry, Vienna University of Technology (VUT), Getreidemarkt 9/163, 1060 Vienna, Austria.*

*E-mail: hannes.mikula@tuwien.ac.at*

<sup>b</sup> *Department of Applied Genetics and Cell Biology, University of Natural Resources and Life Sciences, Vienna (BOKU), Konrad Lorenz Str. 24, 3430 Tulln, Austria.*

<sup>c</sup> *Christian Doppler Laboratory for Mycotoxin Metabolism and Center for Analytical Chemistry, Department for Agrobiotechnology (IFA-Tulln), University of Natural Resources and Life Sciences, Vienna (BOKU), Konrad Lorenz Str. 20, 3430 Tulln, Austria.*

## Table of Contents

---

|                                                                             |            |
|-----------------------------------------------------------------------------|------------|
| <b>1. NMR and HR-MS/MS spectra of 6b, 8, 9 and 11</b>                       | <b>S3</b>  |
| <b>Figure S1:</b> <sup>1</sup> H NMR spectrum of compound <b>6b</b>         | <b>S3</b>  |
| <b>Figure S2:</b> <sup>13</sup> C NMR spectrum of compound <b>6b</b>        | <b>S3</b>  |
| <b>Figure S3:</b> COSY spectrum of compound <b>6b</b>                       | <b>S4</b>  |
| <b>Figure S4:</b> HSQC spectrum of compound <b>6b</b>                       | <b>S4</b>  |
| <b>Figure S5:</b> HMBC spectrum of compound <b>6b</b>                       | <b>S5</b>  |
| <b>Figure S6:</b> HRMS spectra of compound <b>6b</b>                        | <b>S6</b>  |
| <b>Figure S7:</b> HRMS spectra of compound [ <b>6a</b> ]                    | <b>S7</b>  |
| <b>Figure S8:</b> <sup>1</sup> H NMR spectrum of compound <b>8</b>          | <b>S8</b>  |
| <b>Figure S9:</b> <sup>13</sup> C NMR (APT) spectrum of compound <b>8</b>   | <b>S8</b>  |
| <b>Figure S10:</b> <sup>1</sup> H NMR spectrum of compound <b>9</b>         | <b>S9</b>  |
| <b>Figure S11:</b> <sup>13</sup> C NMR (APT) spectrum of compound <b>9</b>  | <b>S9</b>  |
| <b>Figure S12:</b> <sup>1</sup> H NMR spectrum of compound <b>11</b>        | <b>S10</b> |
| <b>Figure S13:</b> <sup>13</sup> C NMR (APT) spectrum of compound <b>11</b> | <b>S10</b> |
| <b>2. Quantum Chemical Calculations</b>                                     | <b>S11</b> |

# 1. NMR spectra of compounds 6b, 8, 9 and 11

Figure S1: <sup>1</sup>H NMR spectrum of compound 6b

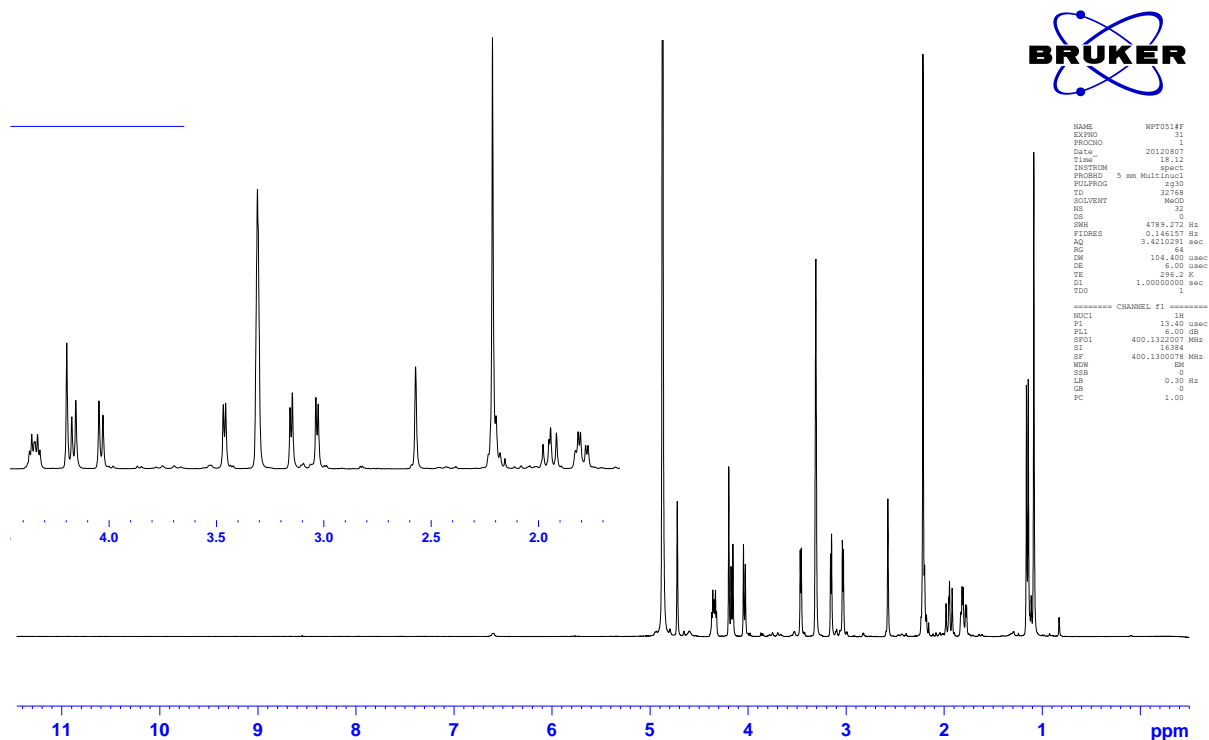

Figure S2: <sup>13</sup>C NMR spectrum of compound 6b

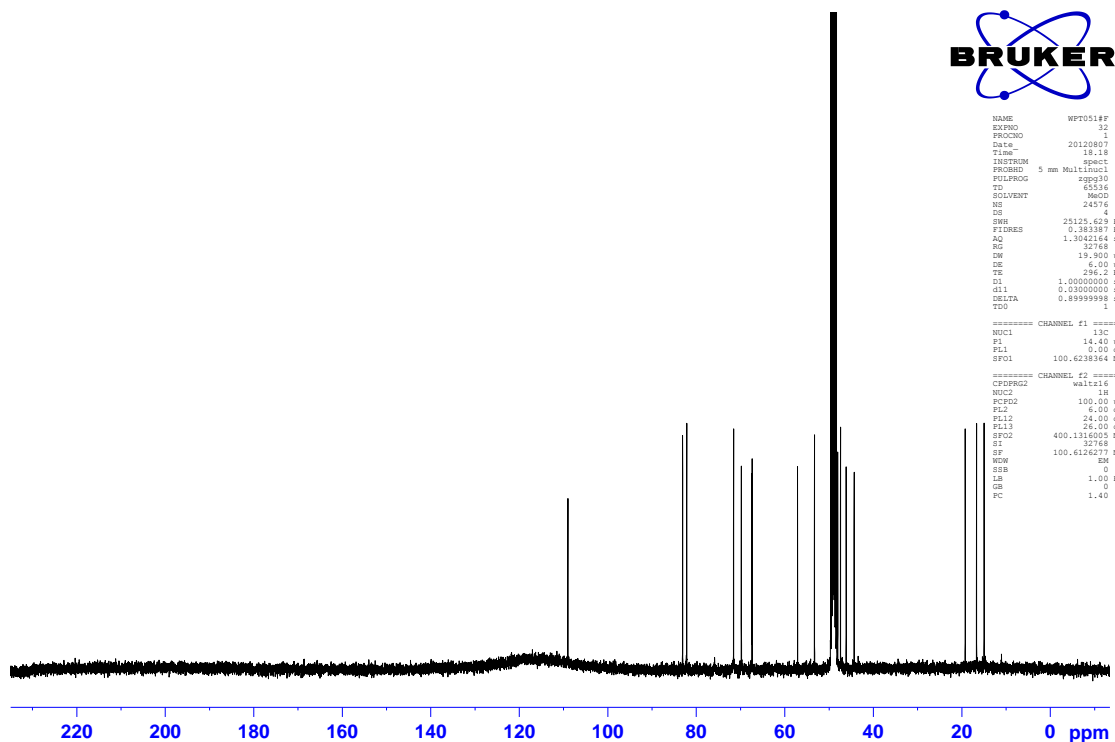

Figure S3: COSY spectrum of compound 6b

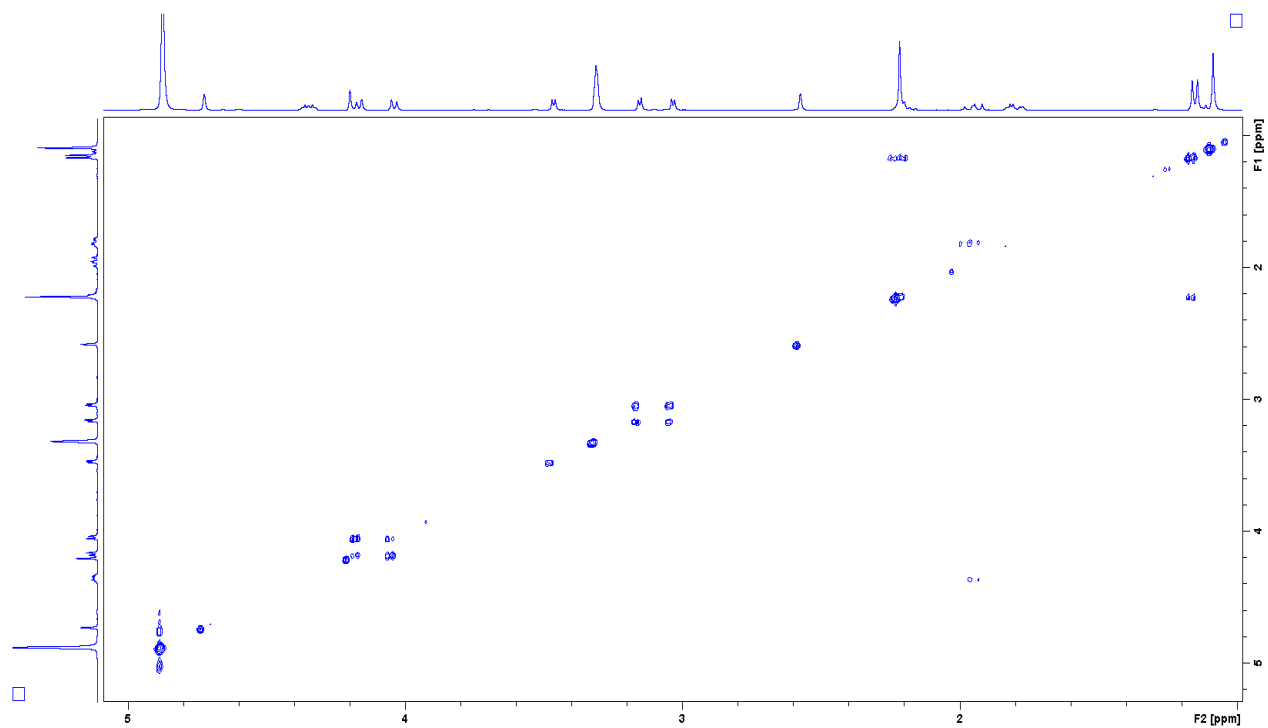

Figure S4: HSQC spectrum of compound 6b

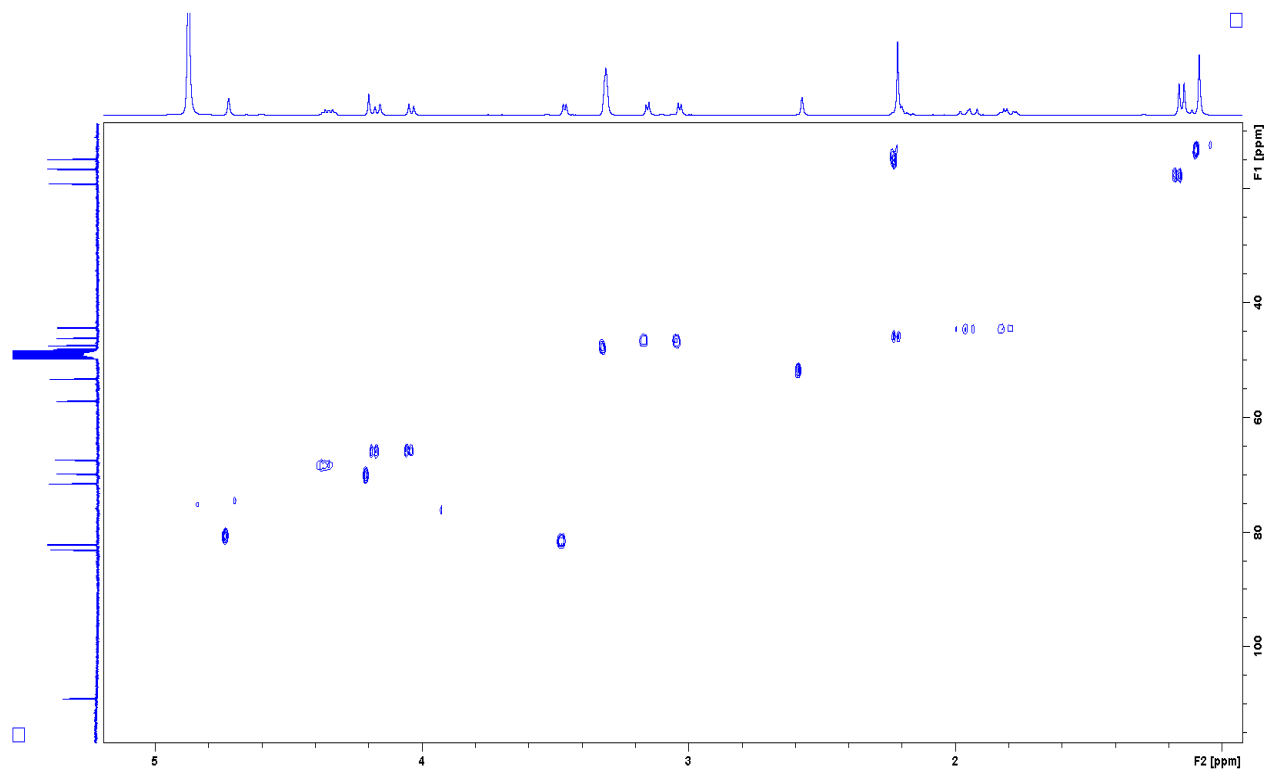

Figure S5: HMBC spectrum of compound **6b**

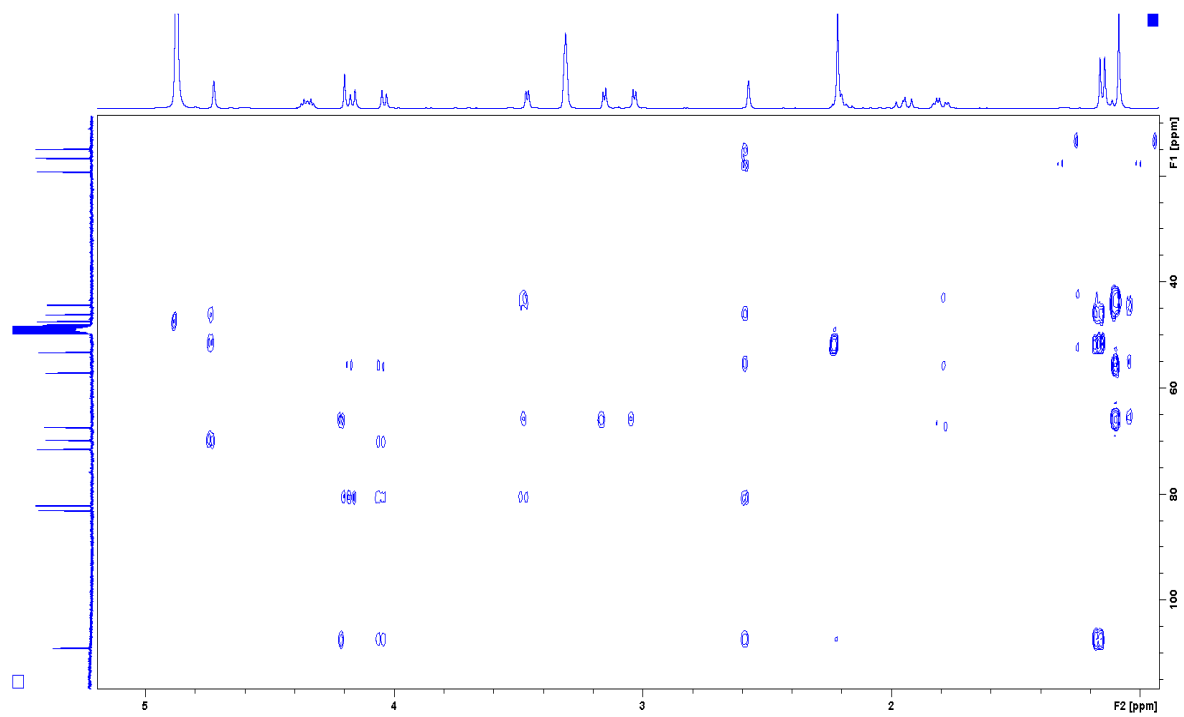

**Figure S6:** HR-MS spectra of compound **6b**

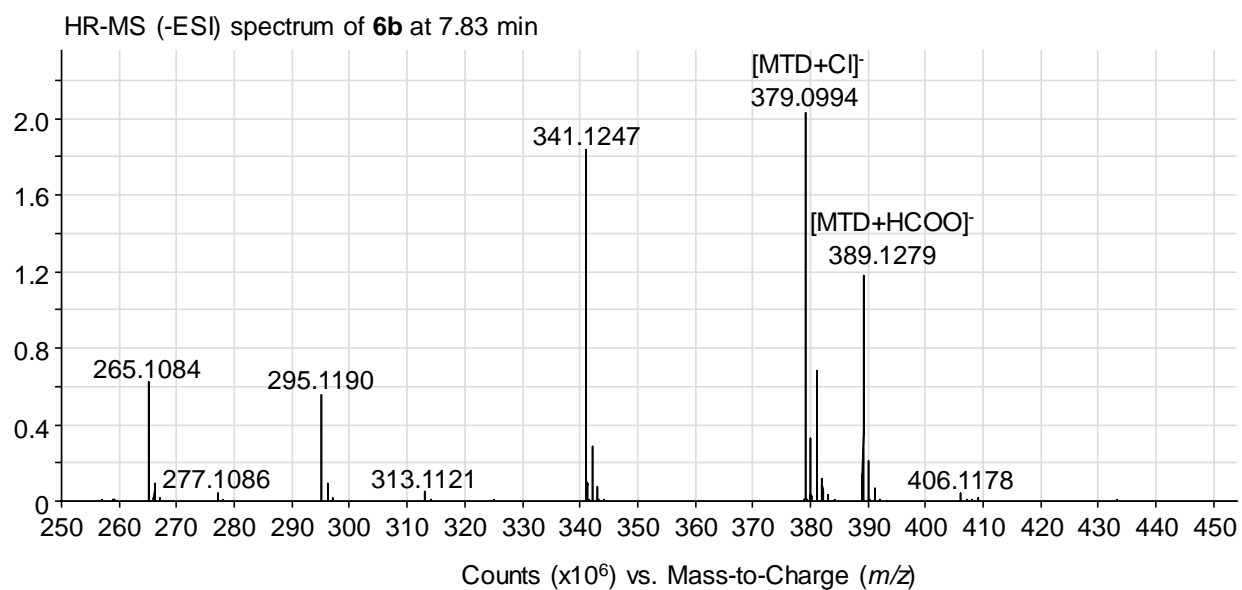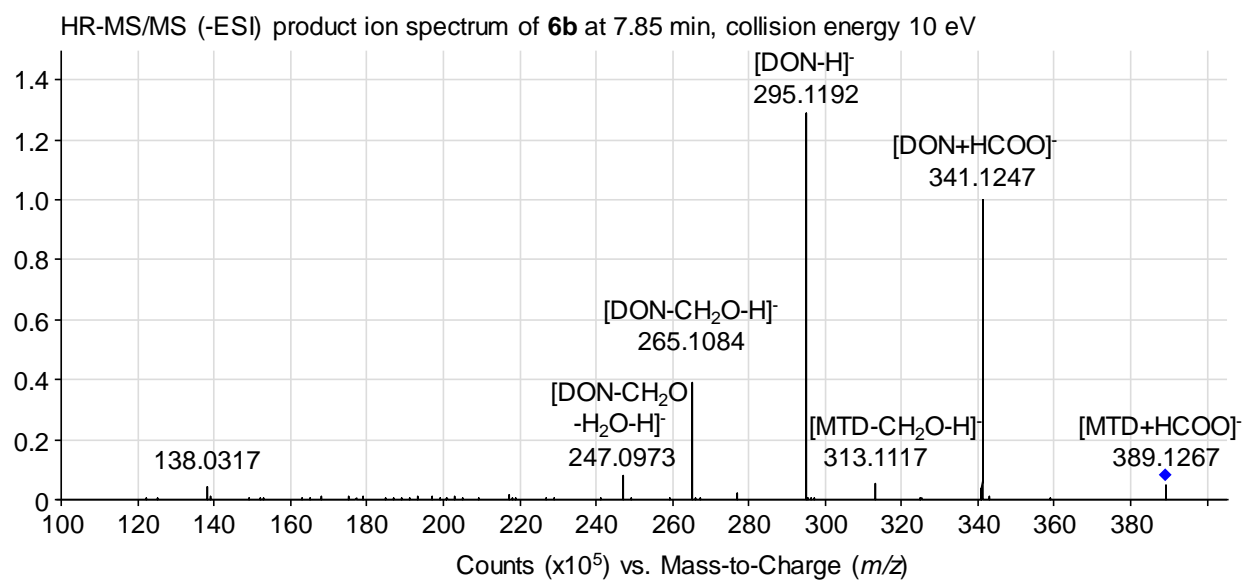

Figure S7: HR-MS spectra of compound [6a]

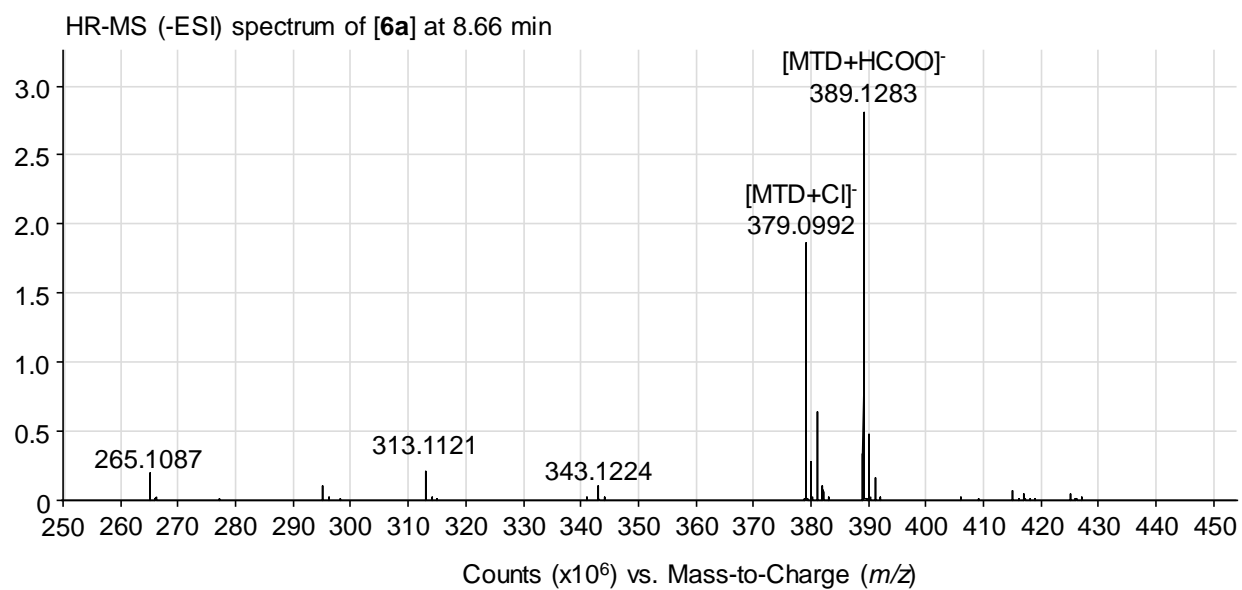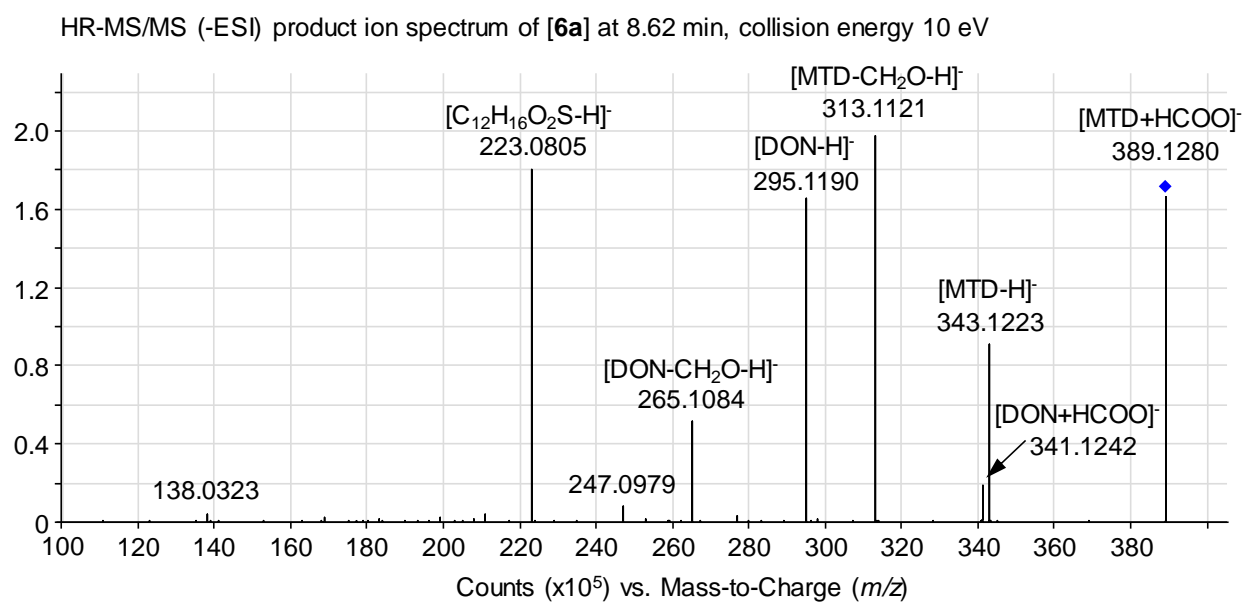

Figure S8:  $^1\text{H}$  NMR spectrum of compound 8

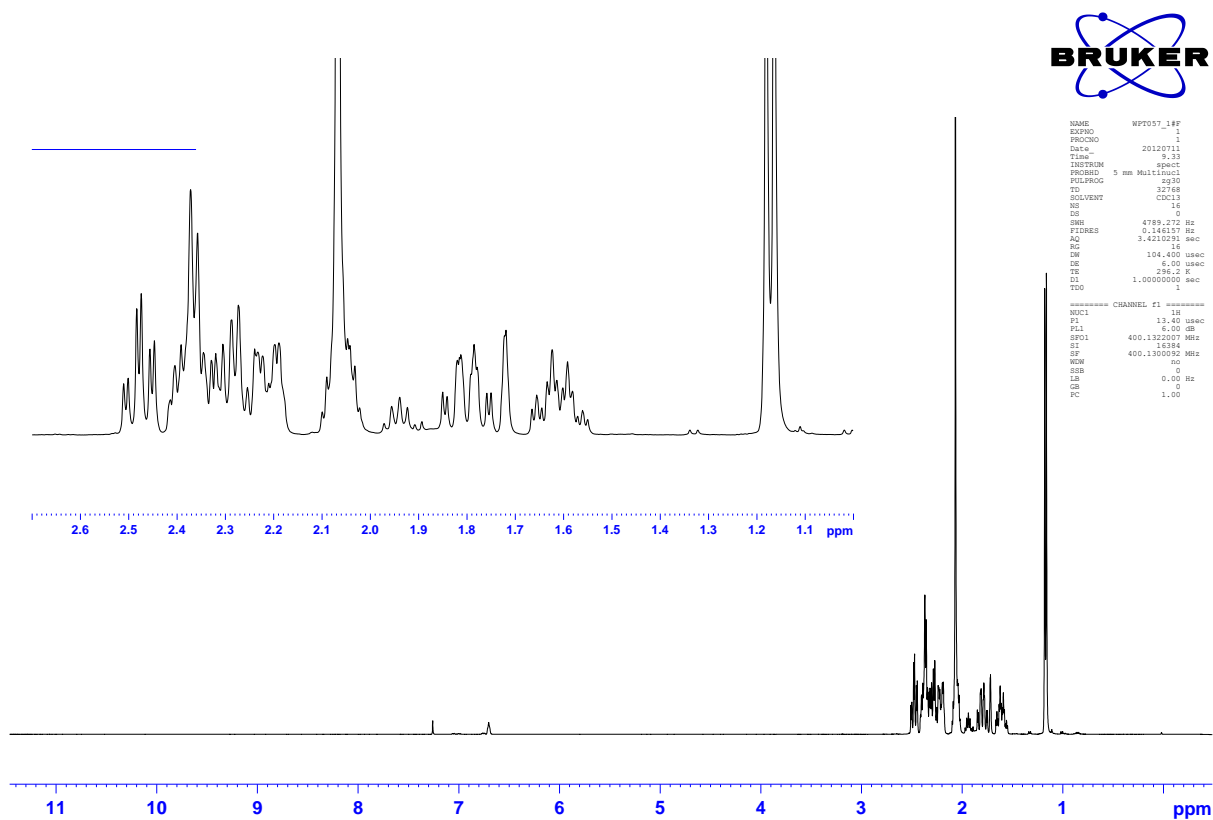

Figure S9:  $^{13}\text{C}$  NMR (APT) spectrum of compound 8

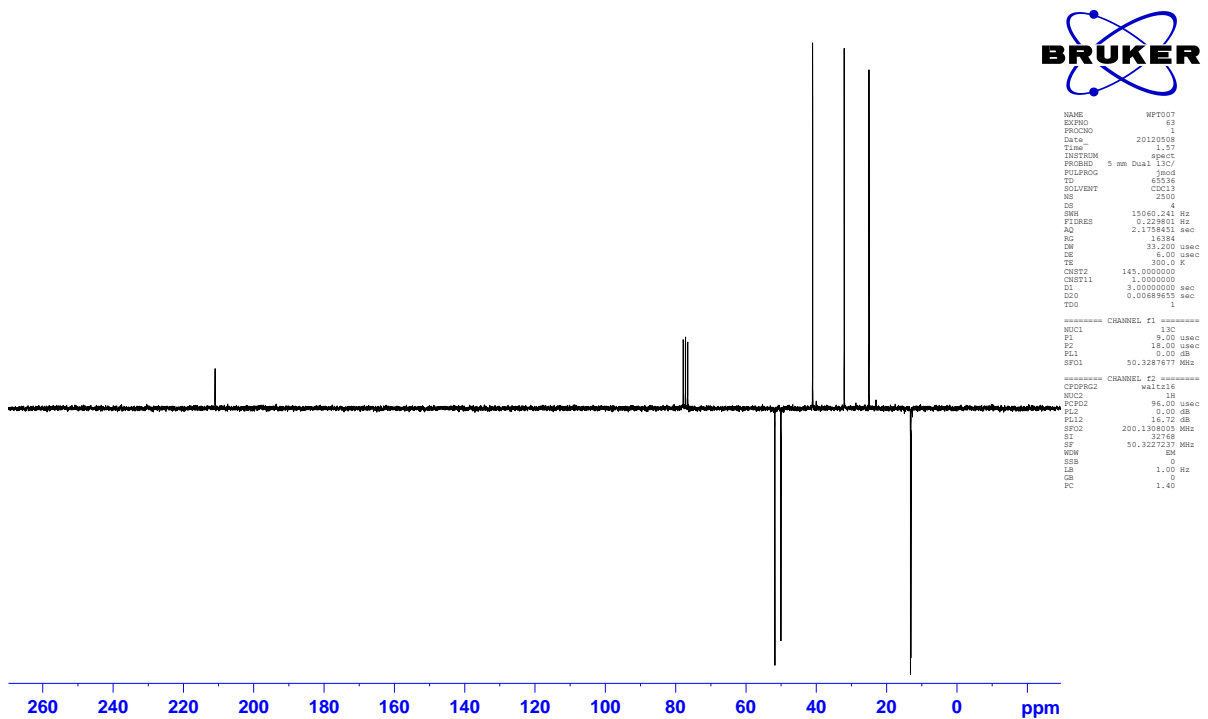



Figure S10:  $^1\text{H}$  NMR spectrum of compound 9

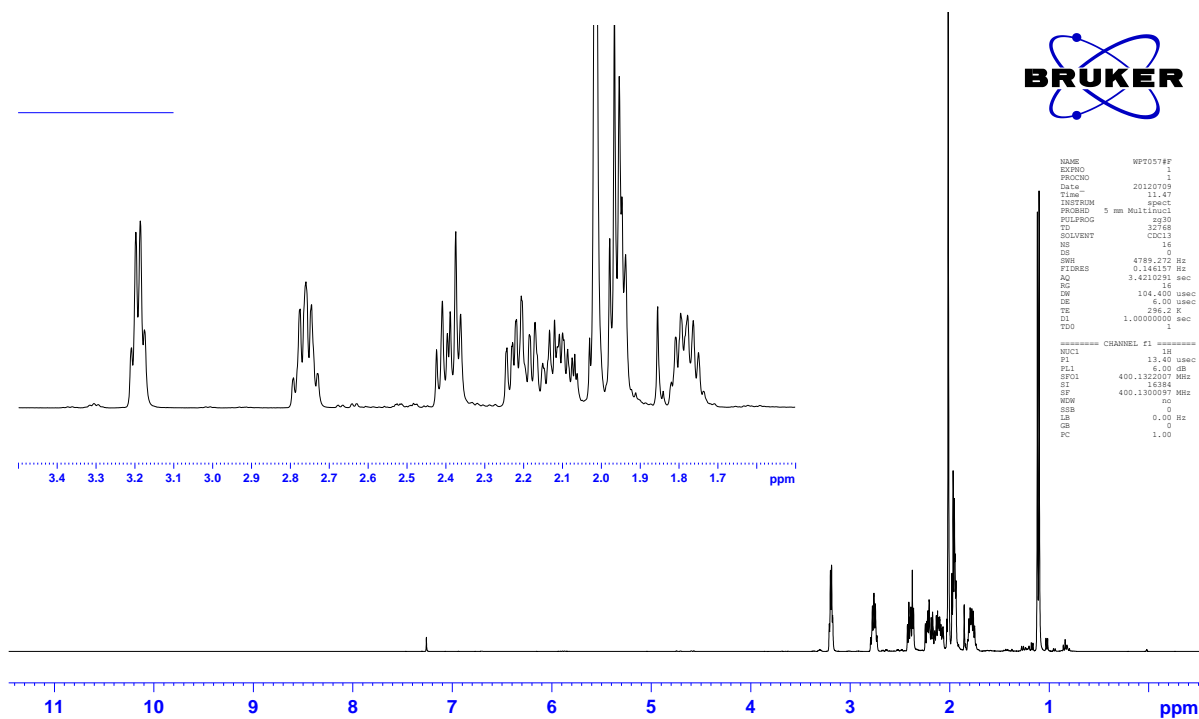

Figure S11:  $^{13}\text{C}$  NMR (APT) spectrum of compound 9

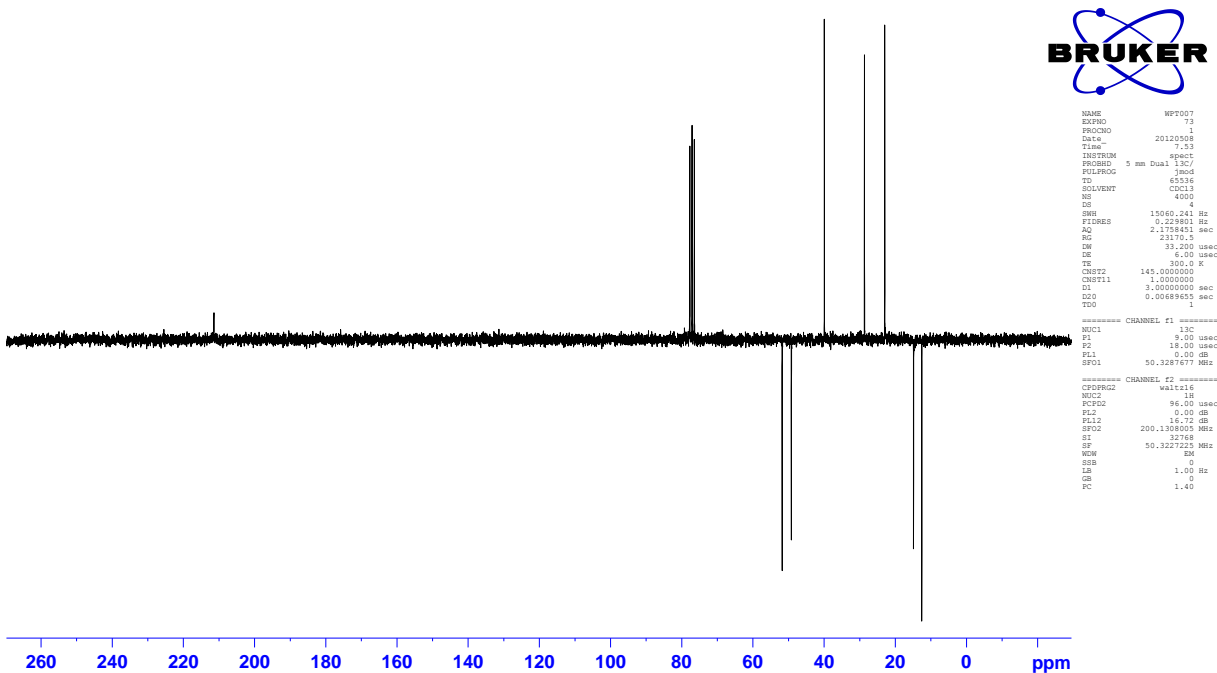

Figure S12:  $^1\text{H}$  NMR spectrum of compound 11

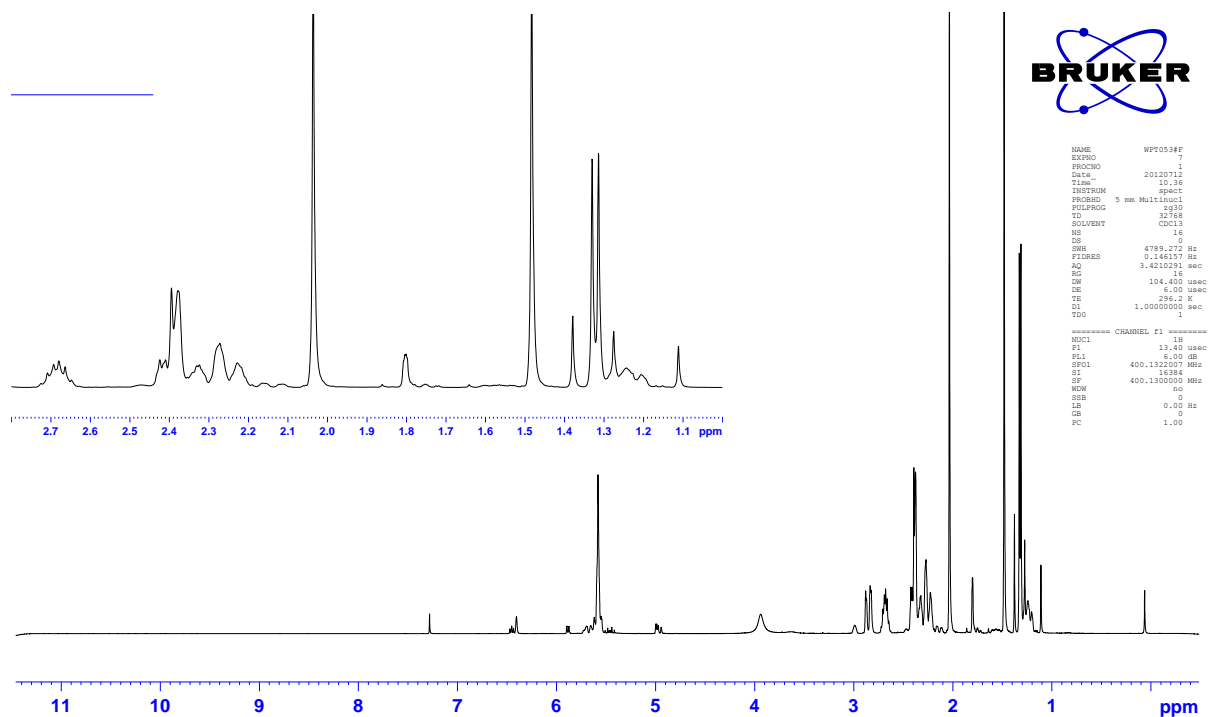

Figure S13:  $^{13}\text{C}$  NMR (APT) spectrum of compound 11

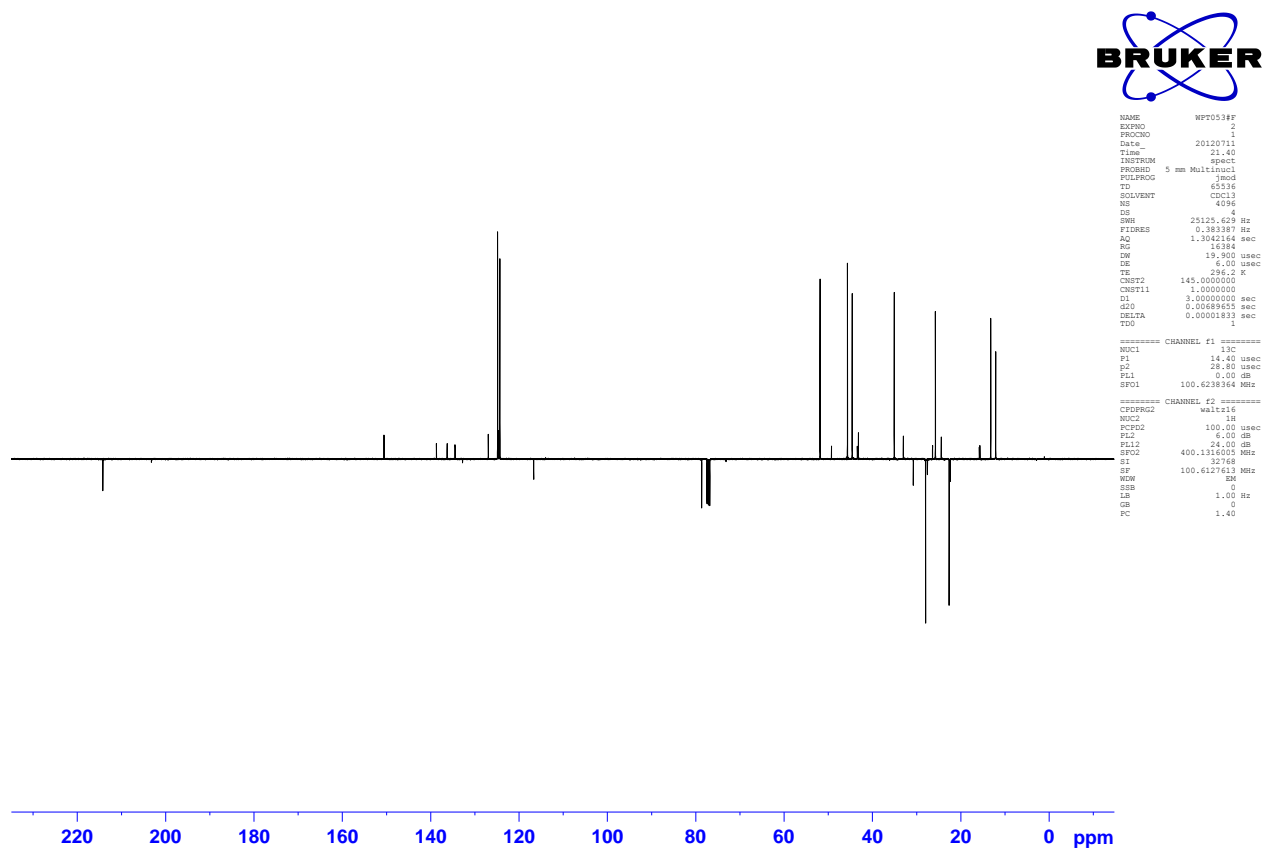

## 2. Quantum Chemical Calculations

---

### Computational methods

Geometry optimisations to energy minima as well as subsequent frequency analyses of all considered starting geometries were achieved applying the PM6 semiempirical method<sup>1</sup> followed by DFT calculations<sup>2</sup> at the level 6-311++G(d,p),<sup>3</sup> using the B3LYP hybrid functional,<sup>4</sup> as implemented in the Gaussian 09 (Revision A.1) program package.<sup>5</sup> For calculations in methanol and water the polarisable continuum model (PCM)<sup>6</sup> using the integral equation formalism variant (IEFPCM) was applied. Data analysis was done using GaussView 5 (Gaussian, Inc.).

### Modelling of hemiketalisation

**Table S1:** Calculated energies for all compounds in gas phase and water.

| Reaction | Compound   | $E_{\text{keto(a)}} [\text{Hartree}]$ |            | $E_{\text{hemiacetal(b)}} [\text{Hartree}]$ |            |
|----------|------------|---------------------------------------|------------|---------------------------------------------|------------|
|          |            | gas phase                             | water      | gas phase                                   | water      |
| i        | <b>I</b>   | -423.3149                             | -423.3270  | -423.3034                                   | -423.3120  |
| ii       | <b>II</b>  | -424.5429                             | -424.5525  | -424.5385                                   | -424.5464  |
| iii      | <b>III</b> | -769.2026                             | -769.2139  | -769.1934                                   | -769.2029  |
| iv       | <b>IV</b>  | -1207.9545                            | -1207.9667 | -1207.9547                                  | -1207.9648 |
| v        | <b>1</b>   | -1035.1823                            | -1035.1993 | -1035.1748                                  | -1035.1903 |
| vi       | <b>6</b>   | -1473.9344                            | -1473.9506 | -1473.9357                                  | -1473.9509 |

---

<sup>1</sup> Stewart, J. P. *J. Mol. Model.* **2007**, *13*, 1173-1213.

<sup>2</sup> (a) Kohn, W.; Sham, L. J. *Phys. Rev.* **1965**, *140*, A1133-A1138. (b) Parr, R. G.; Yang, W. *Density Functional Theory of Atoms and Molecules*. Oxford University Press: London, **1989**.

<sup>3</sup> Krishnan, R.; Binkley, J. S.; Seeger, R.; Pople, J. A. *J. Chem. Phys.* **1980**, *72*, 650-654.

<sup>4</sup> Becke, A. D. *J. Chem. Phys.* **1993**, *98*, 5648-5652.

<sup>5</sup> Frisch, M. J.; Trucks, G. W.; Schlegel, H. B.; Scuseria, G. E.; Robb, M. A.; Cheeseman, J. R.; Scalmani, G.; Barone, V.; Mennucci, B.; Petersson, G. A.; Nakatsuji, H.; Caricato, M.; Li, X.; Hratchian, H. P.; Izmaylov, A. F.; Bloino, J.; Zheng, G.; Sonnenberg, J. L.; Hada, M.; Ehara, M.; Toyota, K.; Fukuda, R.; Hasegawa, J.; Ishida, M.; Nakajima, T.; Honda, Y.; Kitao, O.; Nakai, H.; Vreven, T.; Montgomery, J., J. A.; Peralta, J. E.; Ogliaro, F.; Bearpark, M.; Heyd, J. J.; Brothers, E.; Kudin, K. N.; Staroverov, V. N.; Kobayashi, R.; Normand, J.; Raghavachari, K.; Rendell, A.; Burant, J. C.; Iyengar, S. S.; Tomasi, J.; Cossi, M.; Rega, N.; Millam, J. M.; Klene, M.; Knox, J. E.; Cross, J. B.; Bakken, V.; Adamo, C.; Jaramillo, J.; Gomperts, R.; Stratmann, R. E.; Yazyev, O.; Austin, A. J.; Cammi, R.; Pomelli, C.; Ochterski, J. W.; Martin, R. L.; Morokuma, K.; Zakrzewski, V. G.; Voth, G. A.; Salvador, P.; Dannenberg, J. J.; Dapprich, S.; Daniels, A. D.; Farkas, Ö.; Foresman, J. B.; Ortiz, J. V.; Cioslowski, J.; Fox, D. J., *Gaussian 09, Revision A.1*. Gaussian Inc: Wallingford CT, 2009.

<sup>6</sup> Tomasi, J.; Mennucci, B.; Cammi, R. *Chem. Rev.* **2005**, *105*, 2999-3094.

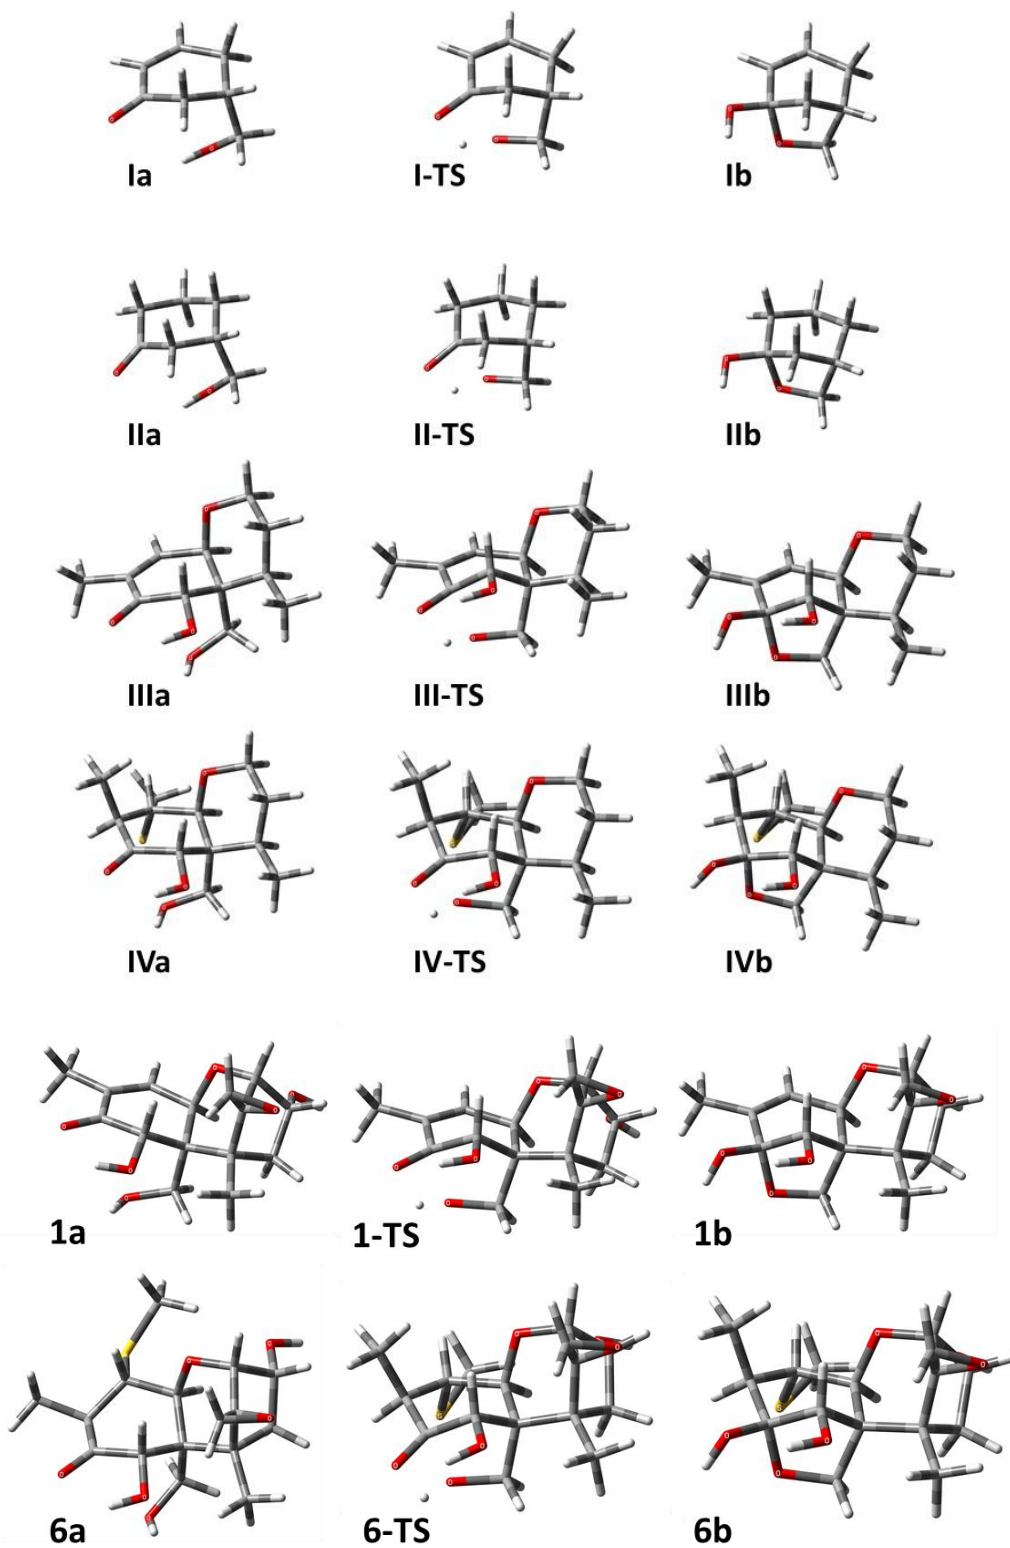

**Figure S14:** Optimised geometries for hemiketalisation of model compounds **I-IV**, **DON (1)** and **MTD (6)**

### **Conformation of MTD (6b) in solution**

On the basis of the observed NOESY correlations several starting geometries of MTD were optimised in gas phase applying PM6 and DFT calculations. Lowest total energy was obtained for conformation **6b**, which was subsequently optimised in solution (MeOH, see Figure 2 in the manuscript).
